# Supplementary material for: Machine Learning in Business Process Monitoring: A Comparison of Deep Learning and Classical Approaches Used for Outcome Prediction
Source: Springer Nature journal article supplement (doi:10.1007/s12599-020-00645-0), 2020-04-08
Supplement: MOESM1 [file 17880252]

# **Machine Learning in Business Process Monitoring – A Comparison of Deep Learning and Classical Approaches used for Outcome Prediction**

**Wolfgang Kratsch, Jonas Manderscheid, Maximilian Röglinger, Johannes Seyfried**

Business & Information Systems Engineering (2020)

**Appendix (available online via <http://link.springer.com>)**

# Appendix A: Overview over Accuracy and F-Score Measures per Log and per Prediction Point

**Table A1: Accuracy LSTM**

| Prefix/<br>Log | 1      | 2      | 3      | 4      | 5      | 6      | 7      | 8      | 9      | 10         | Mean          | Std.          |
|----------------|--------|--------|--------|--------|--------|--------|--------|--------|--------|------------|---------------|---------------|
| <i>BPIC11</i>  | 0.7789 | 0.7741 | 0.7597 | 0.7652 | 0.7585 | 0.7325 | 0.7352 | 0.7103 | 0.7321 | 0.7512     | 0.7498        | 0.0206        |
| <i>BPIC13</i>  | 0.8118 | 0.8251 | 0.8864 | 0.9139 | 0.9583 | 0.9641 | 0.9603 | 0.9839 | 0.9817 | 0.9840     | 0.9269        | 0.0620        |
| <i>RTFM</i>    | 0.9963 | 0.9934 | 0.9937 | 0.9971 | 0.9881 | 0.8854 |        |        |        |            | 0.9757        | 0.0405        |
| <i>PL</i>      | 0.9091 | 0.9000 | 0.9250 | 0.9918 | 0.8396 | 0.8065 | 0.9682 | 0.9905 | 0.7561 | 0.9949     | 0.9082        | 0.0796        |
| <i>RL</i>      | 0.5068 | 0.5068 | 0.6143 | 0.6664 | 0.7372 | 0.7644 | 0.6849 | 0.6831 | 0.7396 | 0.7788     | 0.6682        | 0.0932        |
|                |        |        |        |        |        |        |        |        |        | Aggregated | <b>0.8144</b> | <b>0.0495</b> |

**Table A2: Accuracy DNN**

| Prefix/<br>Log | 1      | 2      | 3       | 4       | 5       | 6       | 7       | 8       | 9       | 10         | Mean          | Std.          |
|----------------|--------|--------|---------|---------|---------|---------|---------|---------|---------|------------|---------------|---------------|
| <i>BPIC11</i>  | 0.7761 | 0.7881 | 0.8368  | 0.7680  | 0.7483  | 0.7478  | 0.7183  | 0.7000  | 0.7263  | 0.7288     | 0.7539        | 0.0400        |
| <i>BPIC13</i>  | 0.7939 | 0.8004 | 0.8434  | 0.8652  | 0.8766  | 0.8873  | 0.9166  | 0.9118  | 0.9206  | 0.9451     | 0.8761        | 0.0511        |
| <i>RTFM</i>    | 0.9963 | 0.9934 | 0.9932  | 0.9964  | 0.9739  | 0.8508  |         |         |         |            | 0.9673        | 0.0577        |
| <i>PL</i>      | 0.7855 | 0.7943 | 0.8500  | 0.7918  | 0.7646  | 0.7652  | 0.9636  | 0.7381  | 0.8976  | 0.7795     | 0.8130        | 0.0700        |
| <i>RL</i>      | 0.5068 | 0.5068 | 0.62708 | 0.66092 | 0.69968 | 0.68764 | 0.68924 | 0.69272 | 0.68704 | 0.68712    | 0.6445        | 0.0755        |
|                |        |        |         |         |         |         |         |         |         | Aggregated | <b>0.8011</b> | <b>0.0589</b> |

**Table A3: Accuracy RF**

| Prefix/<br>Log | 1      | 2      | 3      | 4      | 5      | 6      | 7      | 8      | 9      | 10         | Mean          | Std.          |
|----------------|--------|--------|--------|--------|--------|--------|--------|--------|--------|------------|---------------|---------------|
| <i>BPIC11</i>  | 0.6506 | 0.7926 | 0.6285 | 0.5959 | 0.6030 | 0.6132 | 0.7135 | 0.5637 | 0.6735 | 0.6381     | 0.6473        | 0.0627        |
| <i>BPIC13</i>  | 0.4503 | 0.4836 | 0.6953 | 0.7037 | 0.7832 | 0.8574 | 0.8419 | 0.8305 | 0.8191 | 0.8339     | 0.7299        | 0.1419        |
| <i>RTFM</i>    | 0.9963 | 0.9934 | 0.9932 | 0.9939 | 0.9634 | 0.8278 |        |        |        |            | 0.9613        | 0.0608        |
| <i>PL</i>      | 0.7763 | 0.7500 | 0.7610 | 0.7538 | 0.7632 | 0.7446 | 0.7069 | 0.6886 | 0.7267 | 0.7161     | 0.7387        | 0.0266        |
| <i>RL</i>      | 0.5000 | 0.5000 | 0.5674 | 0.6408 | 0.6648 | 0.6639 | 0.6629 | 0.6664 | 0.6474 | 0.6273     | 0.6141        | 0.0635        |
|                |        |        |        |        |        |        |        |        |        | Aggregated | <b>0.7383</b> | <b>0.0711</b> |

**Table A4: Accuracy SVM**

| Prefix/<br>Log | 1      | 2      | 3      | 4      | 5      | 6      | 7      | 8      | 9      | 10         | Mean          | Std.          |
|----------------|--------|--------|--------|--------|--------|--------|--------|--------|--------|------------|---------------|---------------|
| <i>BPIC11</i>  | 0.7647 | 0.7519 | 0.7401 | 0.7279 | 0.7155 | 0.7055 | 0.6941 | 0.6866 | 0.6783 | 0.6724     | 0.7137        | 0.0318        |
| <i>BPIC13</i>  | 0.7944 | 0.7980 | 0.8544 | 0.8323 | 0.8124 | 0.7888 | 0.7465 | 0.7091 | 0.6866 | 0.7027     | 0.7725        | 0.0580        |
| <i>RTFM</i>    | 0.8964 | 0.9104 | 0.9099 | 0.9609 | 0.9533 | 0.7587 |        |        |        |            | 0.8983        | 0.0731        |
| <i>PL</i>      | 0.7763 | 0.7689 | 0.7610 | 0.7538 | 0.7474 | 0.7446 | 0.7356 | 0.7246 | 0.7205 | 0.7097     | 0.7442        | 0.0217        |
| <i>RL</i>      | 0.5068 | 0.5068 | 0.6145 | 0.6482 | 0.6537 | 0.6469 | 0.6435 | 0.6435 | 0.6435 | 0.6348     | 0.6142        | 0.0576        |
|                |        |        |        |        |        |        |        |        |        | Aggregated | <b>0.7486</b> | <b>0.0484</b> |

**Table A5: F-Score LSTM**

| Prefix/<br>Log | 1      | 2      | 3      | 4      | 5      | 6      | 7      | 8      | 9      | 10         | Mean          | Std.<br>Dev.  |
|----------------|--------|--------|--------|--------|--------|--------|--------|--------|--------|------------|---------------|---------------|
| <i>BPIC11</i>  | 0.8722 | 0.8677 | 0.8558 | 0.8571 | 0.8542 | 0.8347 | 0.8398 | 0.8187 | 0.8313 | 0.8381     | 0.8470        | 0.0162        |
| <i>BPIC13</i>  | 0.7456 | 0.7591 | 0.8832 | 0.9171 | 0.9628 | 0.9698 | 0.9675 | 0.9871 | 0.9860 | 0.9879     | 0.9166        | 0.0881        |
| <i>RTFM</i>    | 0.9981 | 0.9967 | 0.9968 | 0.9986 | 0.9939 | 0.9352 |        |        |        |            | 0.9866        | 0.0230        |
| <i>PL</i>      | 0.9435 | 0.9391 | 0.9528 | 0.9947 | 0.8950 | 0.8765 | 0.9783 | 0.9934 | 0.8401 | 0.9963     | 0.9410        | 0.0517        |
| <i>RL</i>      | 0.0000 | 0.0000 | 0.5375 | 0.6225 | 0.7269 | 0.7605 | 0.6763 | 0.6612 | 0.7387 | 0.7685     | 0.5492        | 0.2824        |
|                |        |        |        |        |        |        |        |        |        | Aggregated | <b>0.8481</b> | <b>0.0923</b> |

**Table A6: F-Score DNN**

| Prefix/<br>Log | 1      | 2      | 3      | 4      | 5      | 6      | 7      | 8      | 9      | 10     | Mean       | Std.<br>Dev.  |               |
|----------------|--------|--------|--------|--------|--------|--------|--------|--------|--------|--------|------------|---------------|---------------|
| <i>BPIC11</i>  | 0.8707 | 0.8747 | 0.8978 | 0.8564 | 0.8452 | 0.8422 | 0.8210 | 0.7917 | 0.8214 | 0.8192 | 0.8440     | 0.0318        |               |
| <i>BPIC13</i>  | 0.7069 | 0.7172 | 0.8414 | 0.8737 | 0.8901 | 0.9024 | 0.9315 | 0.9290 | 0.9385 | 0.9578 | 0.8688     | 0.0894        |               |
| <i>RTFM</i>    | 0.9981 | 0.9967 | 0.9966 | 0.9982 | 0.9864 | 0.9171 |        |        |        |        | 0.9822     | 0.0322        |               |
| <i>PL</i>      | 0.8773 | 0.8775 | 0.9053 | 0.8735 | 0.8497 | 0.8419 | 0.9759 | 0.8070 | 0.9341 | 0.8537 | 0.8796     | 0.0485        |               |
| <i>RL</i>      | 0.0000 | 0.0000 | 0.5828 | 0.6393 | 0.6967 | 0.6589 | 0.6679 | 0.6836 | 0.6810 | 0.6589 | 0.5269     | 0.2795        |               |
|                |        |        |        |        |        |        |        |        |        |        | Aggregated | <b>0.8203</b> | <b>0.0963</b> |

**Table A7: F-Score RF**

| Prefix/<br>Log | 1      | 2      | 3      | 4      | 5      | 6      | 7      | 8      | 9      | 10     | Mean       | Std.<br>Dev.  |               |
|----------------|--------|--------|--------|--------|--------|--------|--------|--------|--------|--------|------------|---------------|---------------|
| <i>BPIC11</i>  | 0.7120 | 0.8749 | 0.7233 | 0.6914 | 0.6950 | 0.7125 | 0.8206 | 0.6420 | 0.7909 | 0.7395 | 0.7403     | 0.0656        |               |
| <i>BPIC13</i>  | 0.4318 | 0.4596 | 0.7391 | 0.7576 | 0.8293 | 0.8884 | 0.8809 | 0.8755 | 0.8712 | 0.8825 | 0.7616     | 0.1658        |               |
| <i>RTFM</i>    | 0.9982 | 0.9967 | 0.9966 | 0.9970 | 0.9814 | 0.9058 |        |        |        |        | 0.9792     | 0.0334        |               |
| <i>PL</i>      | 0.8581 | 0.8446 | 0.8547 | 0.8491 | 0.8480 | 0.8437 | 0.7975 | 0.7847 | 0.8111 | 0.8039 | 0.8295     | 0.0258        |               |
| <i>RL</i>      | 0.5581 | 0.5581 | 0.5673 | 0.6170 | 0.6452 | 0.6553 | 0.6485 | 0.6534 | 0.6317 | 0.5883 | 0.6123     | 0.0385        |               |
|                |        |        |        |        |        |        |        |        |        |        | Aggregated | <b>0.7846</b> | <b>0.0658</b> |

**Table A8: F-Score SVM**

| Prefix/<br>Log | 1      | 2      | 3      | 4      | 5      | 6      | 7      | 8      | 9      | 10     | Mean       | Std.<br>Dev.  |               |
|----------------|--------|--------|--------|--------|--------|--------|--------|--------|--------|--------|------------|---------------|---------------|
| <i>BPIC11</i>  | 0.8667 | 0.8583 | 0.8506 | 0.8425 | 0.8342 | 0.8273 | 0.8194 | 0.8141 | 0.8083 | 0.8041 | 0.8326     | 0.0216        |               |
| <i>BPIC13</i>  | 0.7254 | 0.7294 | 0.8596 | 0.8532 | 0.8512 | 0.8443 | 0.8259 | 0.8100 | 0.8040 | 0.8154 | 0.8118     | 0.0485        |               |
| <i>RTFM</i>    | 0.9380 | 0.9490 | 0.9486 | 0.9795 | 0.9755 | 0.8569 |        |        |        |        | 0.9412     | 0.0444        |               |
| <i>PL</i>      | 0.8740 | 0.8693 | 0.8642 | 0.8596 | 0.8553 | 0.8535 | 0.8476 | 0.8401 | 0.8374 | 0.8300 | 0.8531     | 0.0143        |               |
| <i>RL</i>      | 0.0000 | 0.0000 | 0.5771 | 0.6412 | 0.6447 | 0.6388 | 0.6343 | 0.6343 | 0.6343 | 0.6209 | 0.5026     | 0.2656        |               |
|                |        |        |        |        |        |        |        |        |        |        | Aggregated | <b>0.7883</b> | <b>0.0789</b> |

**Table A9: ROC AUC LSTM**

| Prefix/<br>Log | 1      | 2      | 3      | 4      | 5      | 6      | 7      | 8      | 9      | 10         | Mean          | Std.<br>Dev.  |
|----------------|--------|--------|--------|--------|--------|--------|--------|--------|--------|------------|---------------|---------------|
| <i>BPIC11</i>  | 0.7078 | 0.7187 | 0.6951 | 0.7741 | 0.7668 | 0.7488 | 0.7301 | 0.7298 | 0.7166 | 0.7051     | 0.7293        | 0.0264        |
| <i>BPIC13</i>  | 0.7920 | 0.8030 | 0.8876 | 0.9170 | 0.9598 | 0.9637 | 0.9599 | 0.9836 | 0.9785 | 0.9812     | 0.9226        | 0.0688        |
| <i>RTFM</i>    | 0.5000 | 0.5072 | 0.5404 | 0.7904 | 0.8386 | 0.6696 |        |        |        |            | 0.6410        | 0.1355        |
| <i>PL</i>      | 0.8367 | 0.7851 | 0.8579 | 0.9833 | 0.7681 | 0.6939 | 0.9599 | 0.9833 | 0.6491 | 0.9964     | 0.8514        | 0.1204        |
| <i>RL</i>      | 0.5000 | 0.5000 | 0.6122 | 0.6650 | 0.7368 | 0.7643 | 0.6847 | 0.6825 | 0.7397 | 0.7784     | 0.6664        | 0.0956        |
|                |        |        |        |        |        |        |        |        |        | Aggregated | <b>0.7324</b> | <b>0.0892</b> |

**Table A10: ROC AUC DNN**

| Prefix/<br>Log | 1      | 2      | 3      | 4      | 5      | 6      | 7      | 8      | 9      | 10     | Mean       | Std.<br>Dev.  |               |
|----------------|--------|--------|--------|--------|--------|--------|--------|--------|--------|--------|------------|---------------|---------------|
| <i>BPIC11</i>  | 0.7761 | 0.7881 | 0.8368 | 0.7680 | 0.7483 | 0.7478 | 0.7183 | 0.7000 | 0.7263 | 0.7288 | 0.7539     | 0.0400        |               |
| <i>BPIC13</i>  | 0.7655 | 0.7729 | 0.8443 | 0.8656 | 0.8767 | 0.8897 | 0.9143 | 0.9098 | 0.9154 | 0.9430 | 0.8697     | 0.0600        |               |
| <i>RTFM</i>    | 0.5000 | 0.5000 | 0.5000 | 0.7375 | 0.8327 | 0.5725 |        |        |        |        | 0.6071     | 0.1439        |               |
| <i>PL</i>      | 0.5324 | 0.6048 | 0.7508 | 0.6313 | 0.6403 | 0.6902 | 0.9438 | 0.7167 | 0.8177 | 0.6891 | 0.7017     | 0.1163        |               |
| <i>RL</i>      | 0.5000 | 0.5000 | 0.6260 | 0.6602 | 0.6998 | 0.6867 | 0.6886 | 0.6926 | 0.6871 | 0.6863 | 0.6427     | 0.0782        |               |
|                |        |        |        |        |        |        |        |        |        |        | Aggregated | <b>0.7150</b> | <b>0.0877</b> |

**Table A11: ROC AUC RF**

| Prefix/<br>Log | 1      | 2      | 3      | 4      | 5      | 6      | 7      | 8      | 9      | 10     | Mean       | Std.<br>Dev.  |               |
|----------------|--------|--------|--------|--------|--------|--------|--------|--------|--------|--------|------------|---------------|---------------|
| <i>BPIC11</i>  | 0.7588 | 0.6805 | 0.6004 | 0.5591 | 0.5805 | 0.6177 | 0.5876 | 0.5737 | 0.5820 | 0.5879 | 0.6128     | 0.0581        |               |
| <i>BPIC13</i>  | 0.4585 | 0.4875 | 0.7336 | 0.7792 | 0.8440 | 0.9335 | 0.8931 | 0.8950 | 0.8760 | 0.9071 | 0.7807     | 0.1644        |               |
| <i>RTFM</i>    | 0.6779 | 0.7312 | 0.7438 | 0.9177 | 0.9522 | 0.6535 |        |        |        |        | 0.7794     | 0.1145        |               |
| <i>PL</i>      | 0.6955 | 0.6821 | 0.6695 | 0.7293 | 0.6919 | 0.7025 | 0.6989 | 0.6967 | 0.7272 | 0.7455 | 0.7039     | 0.0221        |               |
| <i>RL</i>      | 0.5057 | 0.5059 | 0.5912 | 0.6948 | 0.7194 | 0.7273 | 0.7259 | 0.7262 | 0.7165 | 0.6865 | 0.6599     | 0.0861        |               |
|                |        |        |        |        |        |        |        |        |        |        | Aggregated | <b>0.7074</b> | <b>0.0890</b> |

**Table A12: ROC AUC SVM**

| Prefix/<br>Log | 1      | 2      | 3      | 4      | 5      | 6      | 7      | 8      | 9      | 10     | Mean       | Std.<br>Dev.  |               |
|----------------|--------|--------|--------|--------|--------|--------|--------|--------|--------|--------|------------|---------------|---------------|
| <i>BPIC11</i>  | 0.7450 | 0.6452 | 0.6004 | 0.5591 | 0.5805 | 0.6177 | 0.5876 | 0.5737 | 0.5820 | 0.5879 | 0.6079     | 0.0511        |               |
| <i>BPIC13</i>  | 0.7817 | 0.7686 | 0.8699 | 0.8672 | 0.8835 | 0.8870 | 0.8850 | 0.8624 | 0.8386 | 0.8380 | 0.8482     | 0.0423        |               |
| <i>RTFM</i>    | 0.5000 | 0.5232 | 0.5254 | 0.7574 | 0.8114 | 0.4835 |        |        |        |        | 0.6001     | 0.1446        |               |
| <i>PL</i>      | 0.5276 | 0.4736 | 0.5000 | 0.5000 | 0.5000 | 0.5000 | 0.5000 | 0.5000 | 0.5000 | 0.5000 | 0.5001     | 0.0127        |               |
| <i>RL</i>      | 0.5000 | 0.5000 | 0.6149 | 0.6585 | 0.6482 | 0.6382 | 0.6335 | 0.6335 | 0.6335 | 0.6240 | 0.6084     | 0.0584        |               |
|                |        |        |        |        |        |        |        |        |        |        | Aggregated | <b>0.6329</b> | <b>0.0618</b> |

# Appendix B: Illustrative Sequence Encoding

Initial Log:

```

1 <trace>
2   <int key="TA0" val="6"/>
3   <float key="TA1" val="3.12"/>
4   <event>
5     <string key="concept:name" value="ev_a"/>
6     <string key="concept:resource" val="res_c"/>
7   </event>
8   <int key="EA1" val="4"/>
9   <event>
10    <string key="concept:name" value="ev_b"/>
11    <int key="EA2" val="7"/>
12    <int key="EA3" val="13"/>
13  </event>
14 </trace>
15 <trace>
16   <int key="TA0" val="8"/>
17   <event>
18     <string key="concept:name" value="ev_a"/>
19     <string key="concept:resource" val="res_a"/>
20   </event>
21   <string key="concept:name" value="ev_b"/>
22   <int key="EA2" val="17"/>
23   <int key="EA3" val="5"/>
24 </event>
25 <event>
26   <string key="concept:name" value="ev_c"/>
27   <int key="EA4" val="4"/>
28   <int key="EA5" val="16"/>
29 </event>
30 </trace>
31 <trace>
32   <int key="TA1" val="14"/>
33   <event>
34     <string key="concept:name" value="ev_a"/>
35     <string key="concept:resource" val="res_a"/>
36     <int key="EA1" val="1"/>
37   </event>
38 </trace>

```

Log after Step 1:

- Labels are added
- Float-attribute is transformed to an int-attribute

```

1 <trace>
2   <int key="TA0" val="6"/>
3   <int key="TA1" val="312"/>
4   <int key="label" val="0"/>
5   <event>
6     <string key="concept:name" value="ev_a"/>
7     <string key="concept:resource" val="res_c"/>
8     <int key="EA1" val="4"/>
9   </event>
10  <event>
11    <string key="concept:name" value="ev_b"/>
12    <int key="EA2" val="7"/>
13    <int key="EA3" val="13"/>
14  </event>
15 </trace>
16 <trace>
17   <int key="TA0" val="8"/>
18   <int key="label" val="1"/>
19   <event>
20     <string key="concept:name" value="ev_a"/>
21     <string key="concept:resource" val="res_a"/>
22   </event>
23   <string key="concept:name" value="ev_b"/>
24   <int key="EA2" val="17"/>
25   <int key="EA3" val="5"/>
26 </event>
27 <event>
28   <string key="concept:name" value="ev_c"/>
29   <int key="EA4" val="4"/>
30   <int key="EA5" val="16"/>
31 </event>
32 </trace>
33 <trace>
34   <int key="TA1" val="14"/>
35   <int key="label" val="0"/>
36   <event>
37     <string key="concept:name" value="ev_a"/>
38     <string key="concept:resource" val="res_a"/>
39     <int key="EA1" val="1"/>
40   </event>
41 </trace>
42

```

Log after Step 2:

- Trace 3 is removed due to too few events
- Event 3 is removed from trace 2 due to too many events

```

1 <trace>
2   <int key="TA0" val="6"/>
3   <int key="TA1" val="312"/>
4   <int key="label" val="0"/>
5   <event>
6     <string key="concept:name" value="ev_a"/>
7     <string key="concept:resource" val="res_c"/>
8     <int key="EA1" val="4"/>
9   </event>
10  <event>
11    <string key="concept:name" value="ev_b"/>
12    <int key="EA2" val="7"/>
13    <int key="EA3" val="13"/>
14  </event>
15 </trace>
16 <trace>
17   <int key="TA0" val="8"/>
18   <int key="label" val="1"/>
19   <event>
20     <string key="concept:name" value="ev_a"/>
21     <string key="concept:resource" val="res_a"/>
22   </event>
23   <string key="concept:name" value="ev_b"/>
24   <int key="EA2" val="17"/>
25   <int key="EA3" val="5"/>
26 </event>
27 </trace>

```

Log after Step 3:

- Trace-attribute „TA1“ is added to trace 2 with a replacement value
- Event-attribute „EA1“ is added to event 2 in trace 2 with a replacement value

```

1 <trace>
2   <int key="TA0" val="6"/>
3   <int key="TA1" val="312"/>
4   <int key="label" val="0"/>
5   <event>
6     <string key="concept:name" value="ev_a"/>
7     <string key="concept:resource" val="res_c"/>
8     <int key="EA1" val="4"/>
9   </event>
10  <event>
11    <string key="concept:name" value="ev_b"/>
12    <string key="concept:resource" val="res_x"/>
13    <int key="EA2" val="7"/>
14    <int key="EA3" val="13"/>
15  </event>
16 </trace>
17 <trace>
18   <int key="TA0" val="8"/>
19   <int key="TA1" val="4"/>
20   <int key="label" val="1"/>
21   <event>
22     <string key="concept:name" value="ev_a"/>
23     <string key="concept:resource" val="res_a"/>
24     <int key="EA1" val="16"/>
25   </event>
26   <event>
27     <string key="concept:name" value="ev_b"/>
28     <string key="concept:resource" val="res_x"/>
29     <int key="EA2" val="17"/>
30     <int key="EA3" val="5"/>
31   </event>
32 </trace>

```

Log after step 4 (before applying One-Hot-Encoding):

- Trace-attributes are added to each event.
- Log transformed from an XML-format to a tabular form

|   |     |     |              |                  |     |              |                  |     |     |       |
|---|-----|-----|--------------|------------------|-----|--------------|------------------|-----|-----|-------|
| 1 | TA0 | TA1 | concept:name | concept:resource | EA1 | concept:name | concept:resource | EA2 | EA3 | label |
| 2 | 6   | 312 | ev_a         | res_c            | 4   | ev_b         | res_x            | 7   | 13  | 0     |
| 3 | 8   | 4   | ev_a         | res_a            | 16  | ev_b         | res_x            | 17  | 5   | 1     |

Event 1

Event 2

Figure B1: Illustrative sequence encoding for an example process log for prediction point two

## Appendix C: Hyper-parameterization of the used classifiers

Table C1: Hyper-parameterization of the used classifiers

|             | <i>Parameter</i>                    | <i>Description</i>                                                                                                           | <i>Value</i>                  |
|-------------|-------------------------------------|------------------------------------------------------------------------------------------------------------------------------|-------------------------------|
| <i>DNN</i>  | Learning Rate                       | Size of the step taken at each iteration                                                                                     | $10^{-[1,2,3,4,5,6]}$         |
|             | Maximum number of epochs            | Maximum number of times the training data is processed <sup>1</sup>                                                          | 50                            |
|             | Early Stopping: $\min \delta$       | Minimum change in the loss value to qualify as an improvement                                                                | $10^{-6}$                     |
|             | Early Stopping: patience            | Number of epochs with no improvements after which the training process will stop                                             | 15                            |
|             | Dropout                             | Proportion of units to drop for the input's linear transformation                                                            | uniform(0,0.3)                |
|             | Optimizer                           | Optimizes the loss function                                                                                                  | [ <i>Adam, SGD, RMSprop</i> ] |
|             | Number of hidden layers             | Number of hidden layers                                                                                                      | [2,3,4]                       |
|             | Hidden layer specification          | Number of input neurons in the respective hidden layer                                                                       | [64,128,256,512,1024]         |
|             | Activation function of output layer | Function that specifies when an output neuron is activated                                                                   | <i>Sigmoid</i>                |
|             | Loss function                       | Function that is minimized during training                                                                                   | Binary Crossentropy           |
| <i>LSTM</i> | Recurrent Dropout                   | Proportion of units to drop for recurrent state's linear transformation                                                      | uniform(0,0.3)                |
| <i>RF</i>   | Number of decision trees            | Number of decision trees that are built during the training process                                                          | [50,100,200,400,800,1600]     |
|             | Number of maximum Features          | Maximum number of features used for a split                                                                                  | uniform(0,numFeatures)        |
|             | Minimum number of leaves            | The minimum number of samples that must be at a leaf node                                                                    | rand(1,11)                    |
|             | Minimum number of samples           | Number of cases required to build a new decision criterion                                                                   | rand(2,11)                    |
|             | Maximum depth                       | Limit of the maximum depth; increasing the depth can increase the precision but tends to cause overfitting                   | [3, <i>Indefinite</i> ]       |
|             | Bootstrap                           | Defines whether bootstrap samples are used when building trees                                                               | [ <i>true, false</i> ]        |
|             | Criterion                           | Defines the function to measure the quality of a split                                                                       | [ <i>gini, entropy</i> ]      |
| <i>SVM</i>  | Kernel                              | Kernel type used in the algorithm                                                                                            | rbf                           |
|             | C                                   | Penalty parameter of the error term; weights the misclassification of training examples against simplicity of the classifier | rand(1,100)                   |
|             | Gamma                               | Kernel coefficient defining how much influence a single training example has                                                 | rand( $10^{-4}$ , $10^3$ )    |

<sup>1</sup> We used this parameter as an upper limit in order to save computing time. Additionally, we applied an early stopping approach to terminate the training process as long as there were no further improvements. On average, the training was stopped after the 30<sup>th</sup> epoch.
